# Supplementary material for: Hierarchically porous three-dimensional electrodes of CoMoO4and ZnCo2O4and their high anode performance for lithium ion batteries
Source: Royal Society of Chemistry journal article supplement (doi:10.1039/c4nr03631j), 2014-07-25
Supplement: c4nr03631j1.pdf [file c4nr03631j1.pdf]

Supporting Information for

## **Hierarchically porous three-dimensional electrodes of $\text{CoMoO}_4$ and $\text{ZnCo}_2\text{O}_4$ and their high anode performance for lithium ion battery**

Hong Yu,<sup>‡ac</sup> Cao Guan,<sup>‡b</sup> Xianhong Rui,<sup>a</sup> Bo Ouyang,<sup>a</sup> Boluo Yadian,<sup>a</sup> Yizhong Huang,<sup>a</sup> Hua Zhang,<sup>a</sup> Harry E. Hoster,<sup>c</sup> Hongjin Fan<sup>\*b</sup> and Qingyu Yan<sup>\*acd</sup>

<sup>a</sup> School of Materials Science and Engineering, Nanyang Technological University, Singapore 639798, Singapore.

<sup>b</sup> Division of Physics and Applied Physics, School of Physical and Mathematical Sciences, Nanyang Technological University, 637371, Singapore.

<sup>c</sup> TUM CREATE, 1 CREATE Way, #10-02 CREATE Tower, Singapore 138602, Singapore.

<sup>d</sup> Energy Research Institute@NTU, Nanyang Technological University, Singapore 637553, Singapore

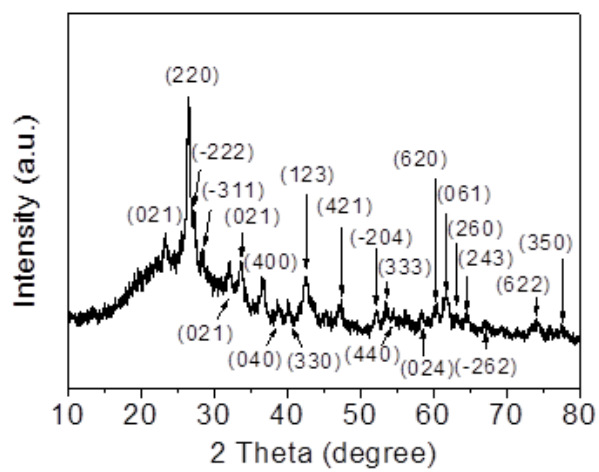

**Fig. S1** The XRD patterns of the hierarchically porous 3D CoMoO<sub>4</sub> electrode

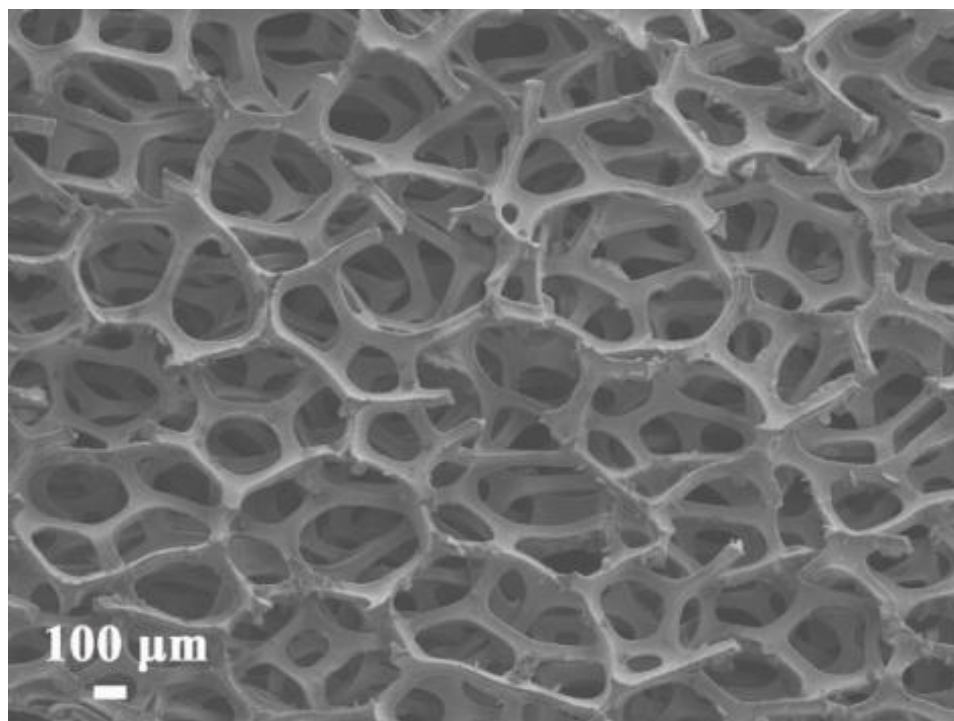

**Fig. S2** Low magnification FESEM images of the macroporous framework of Ni foam with uniformly grown CoMoO<sub>4</sub> nanostructures.

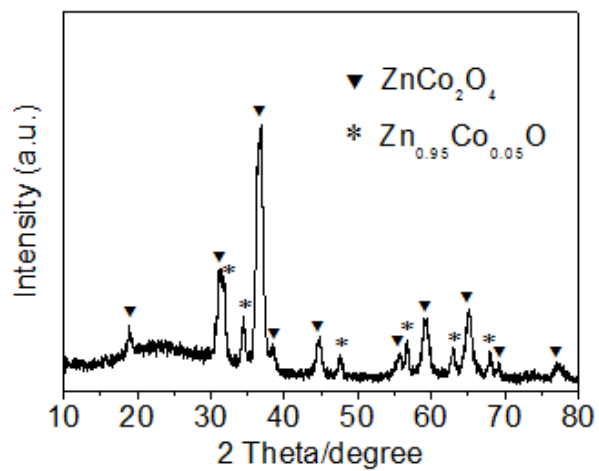

**Fig. S3** The XRD patterns of the hierarchically porous 3D  $\text{ZnCo}_2\text{O}_4$  electrode.

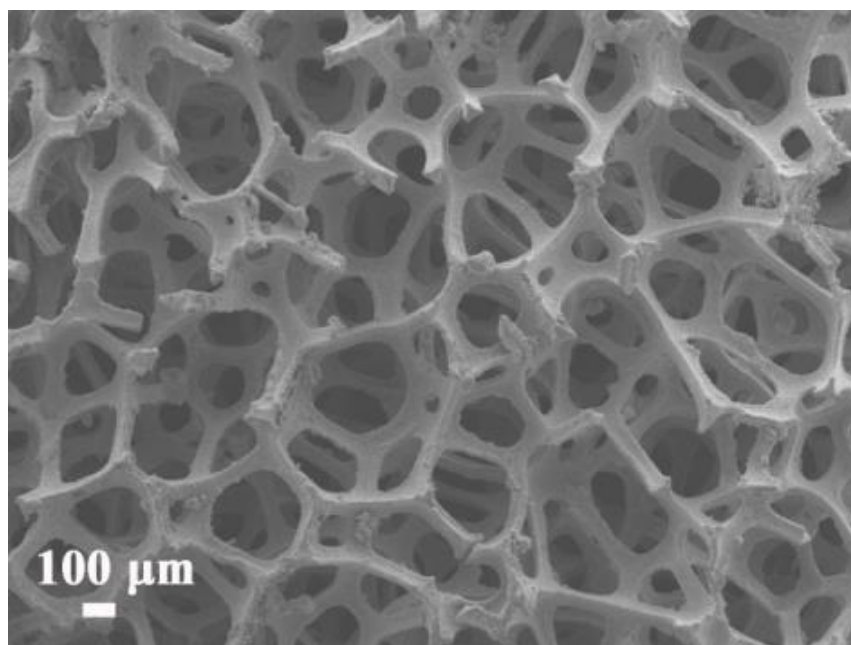

**Fig. S4** Low magnification FESEM image of the macroporous framework of Ni foam with uniformly grown  $\text{ZnCo}_2\text{O}_4$  nanostructures.
